# Supplementary material for: The NOTCH3 Downstream Target HEYL Is Required for Efficient Human Airway Basal Cell Differentiation
Source: MDPI journal article supplement (doi:10.3390/cells10113215), 2021-11-18
Supplement: s1 [file s1]

**A. PCNA western blot images**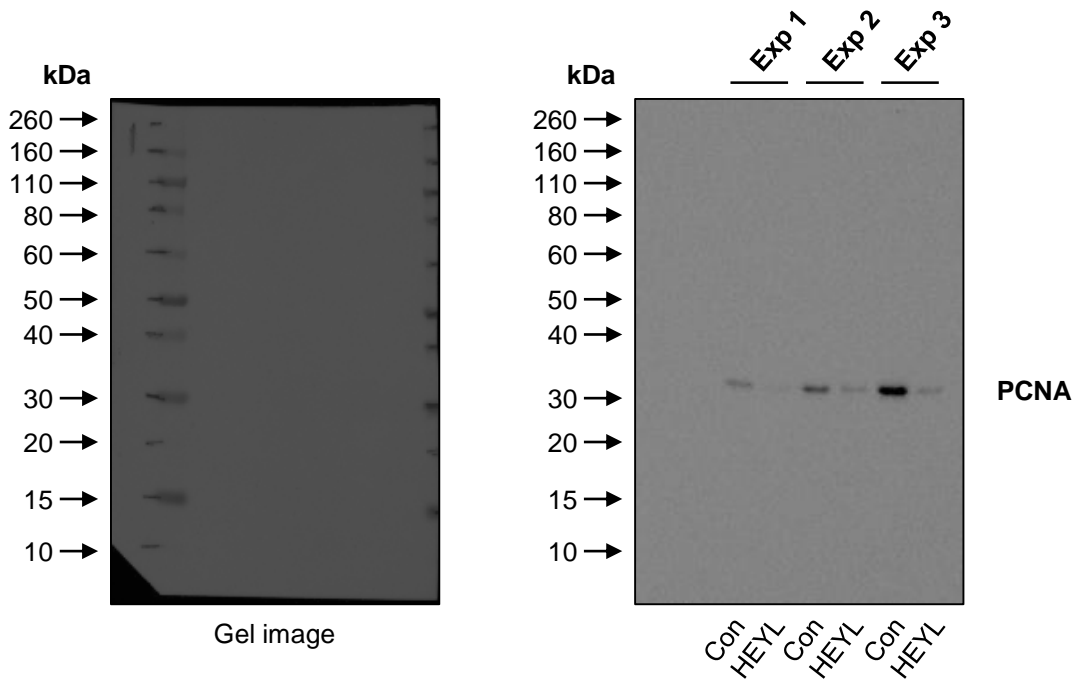**B.  $\beta$ -tubulin western blot images**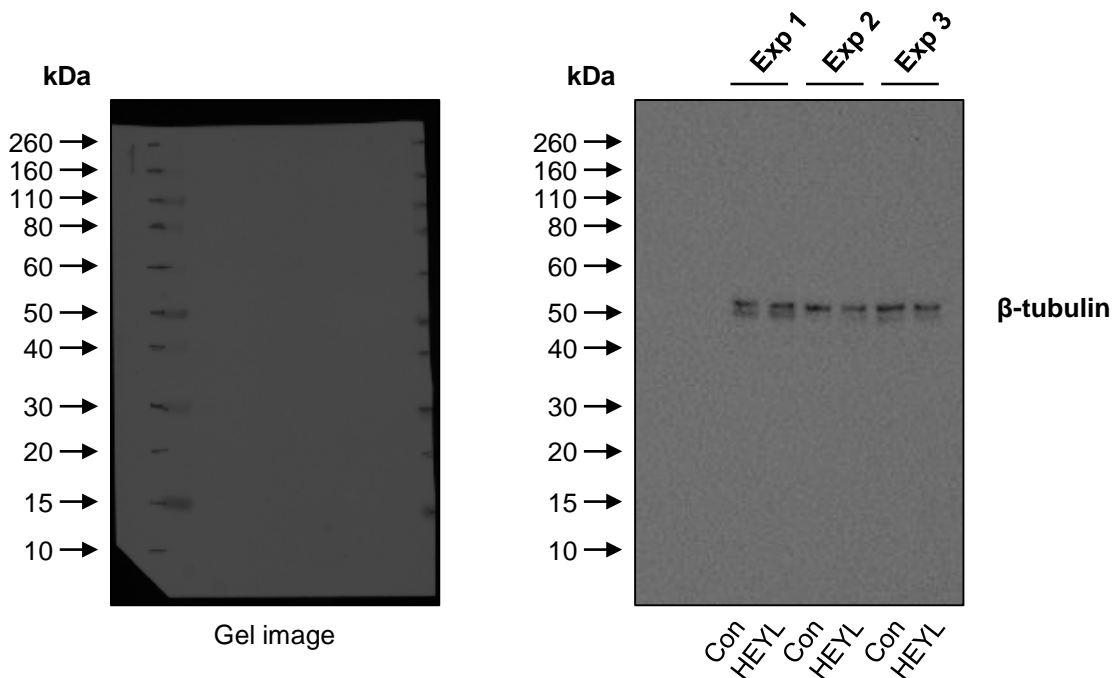

**Supplementary Figure S1.** Original western blot images of PCNA and  $\beta$ -tubulin protein levels in HBECS (n=3 donors) transfected with either control (siCon) or HEYL (siHEYL) specific siRNA on ALI culture. At ALI day 7 the cells were harvested for analysis. (A) PCNA western blot images. (B)  $\beta$ -tubulin western blot images.

A. ALI day 0

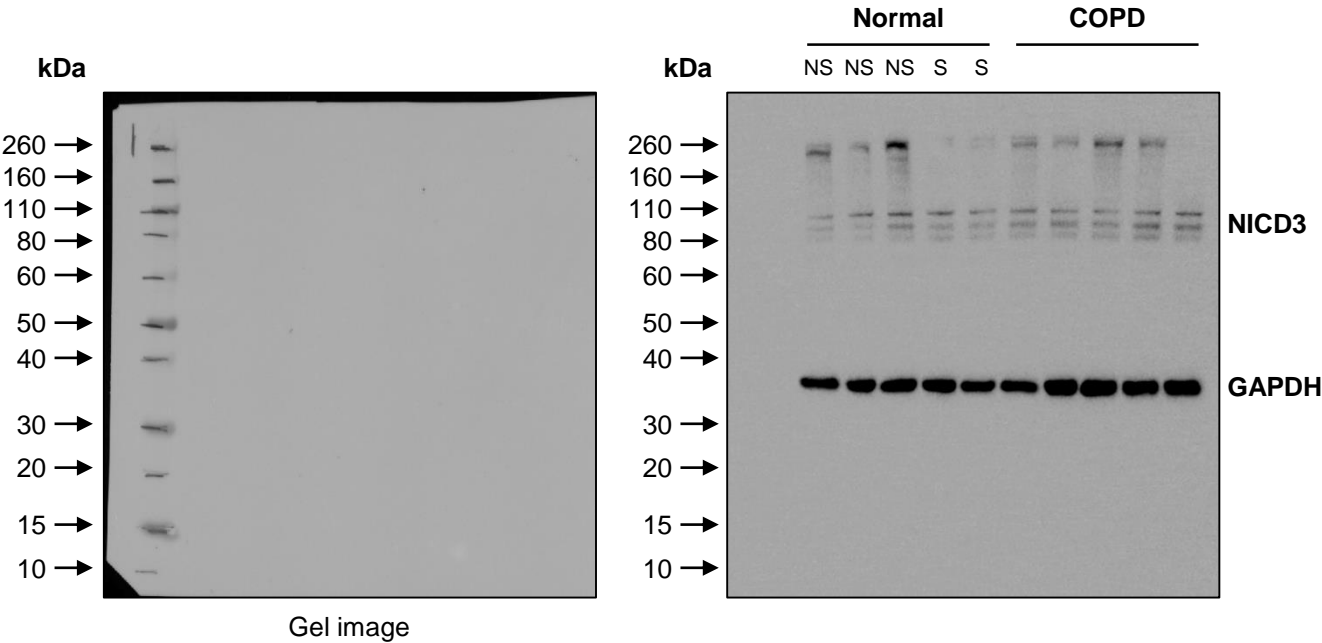

B. ALI day 7

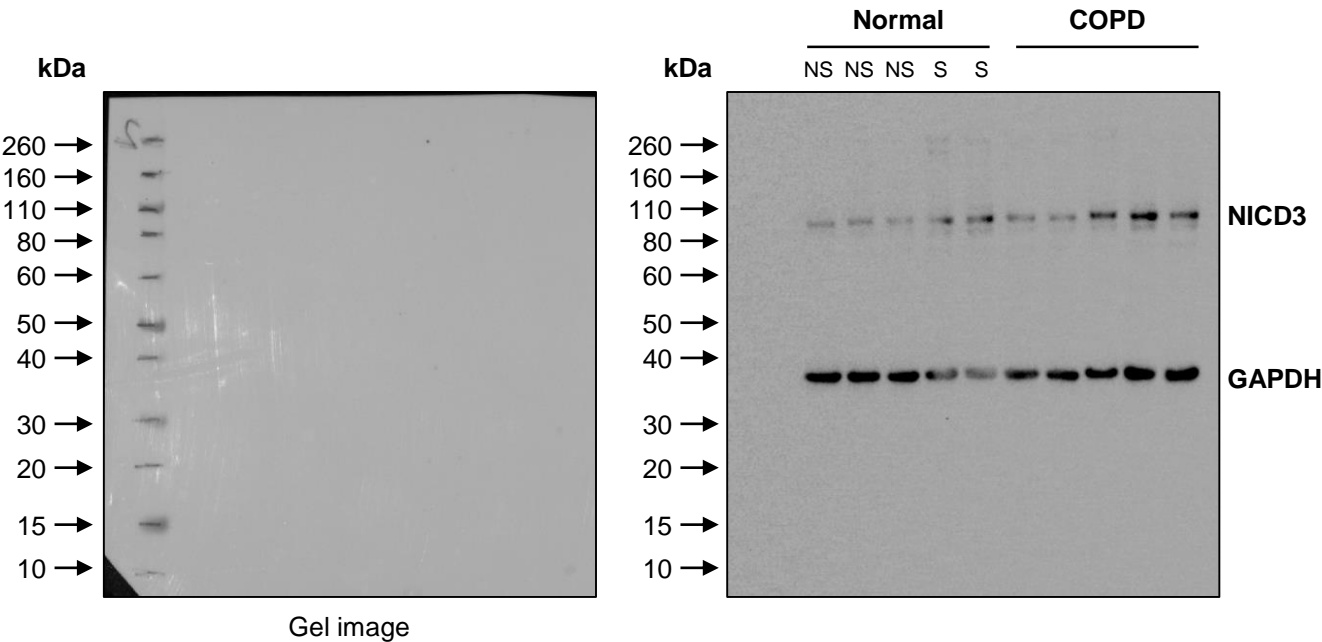

**C. ALI day 14**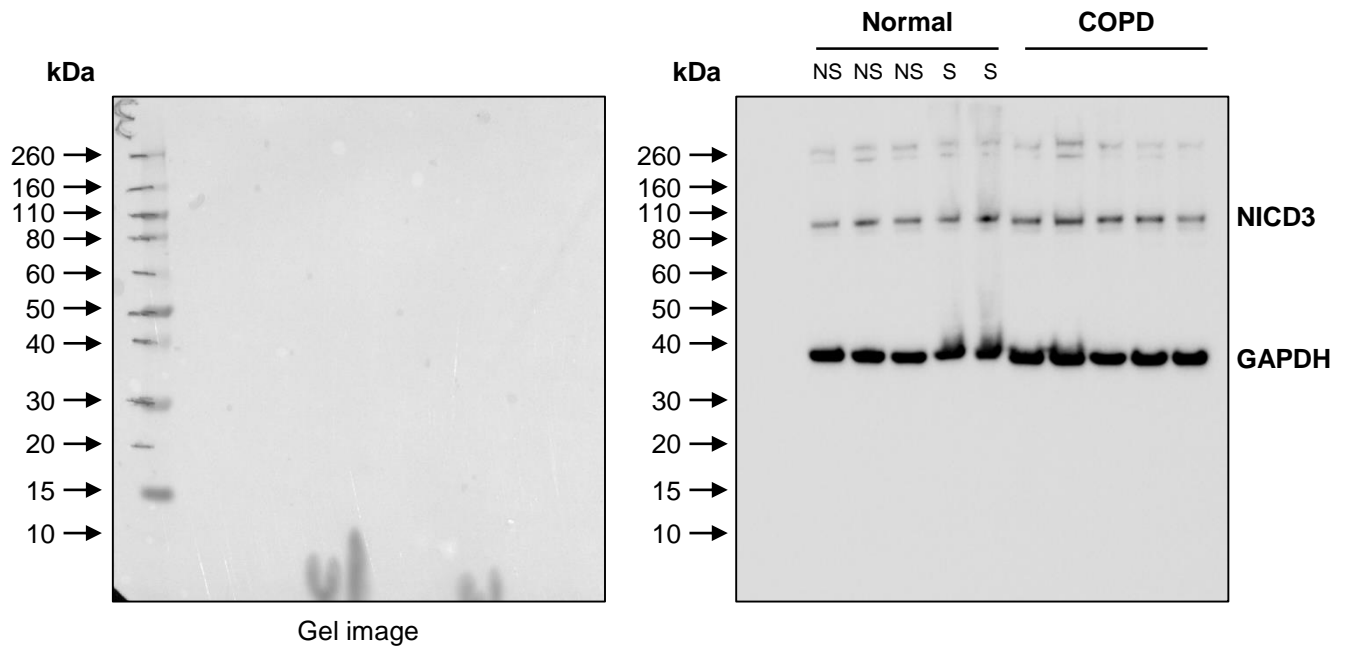**D. ALI day 28**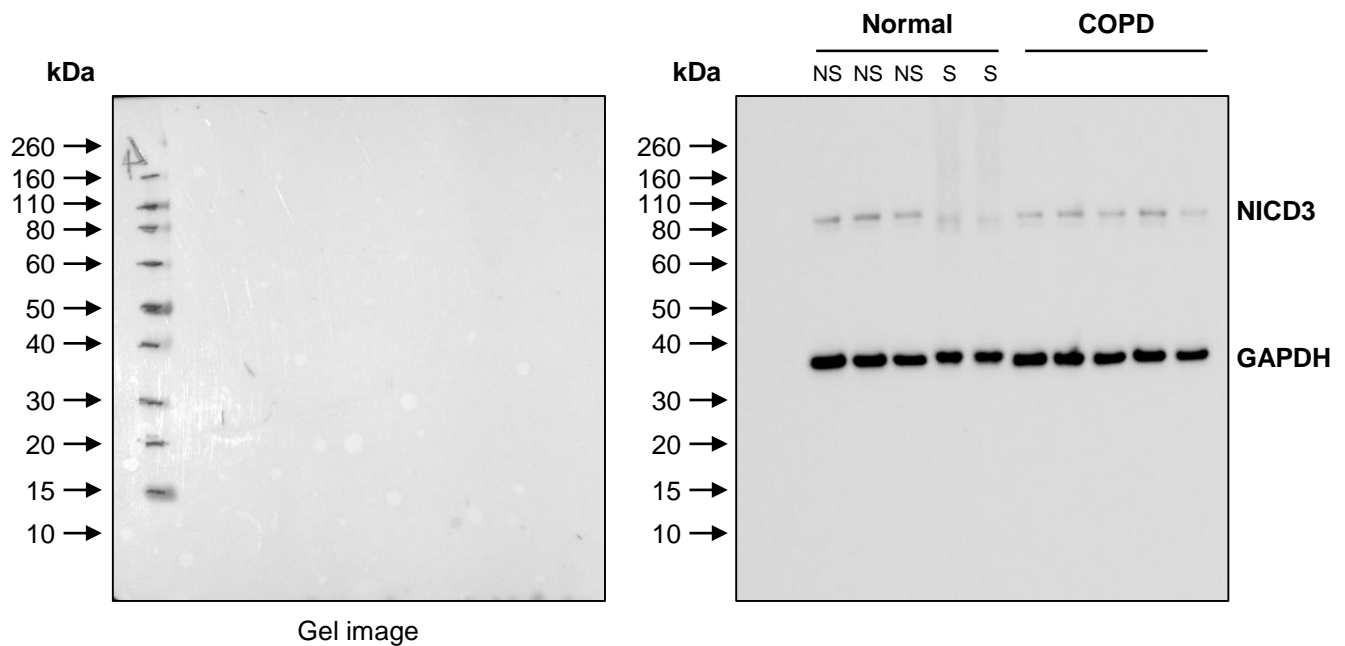

**Supplementary Figure S2.** Original western blot images of NICD3 and GAPDH protein levels in normal (n=3 nonsmoker donors and n=2 smoker donors) and COPD (n=5 donors) HBECs as a function of time during ALI culture (day 0, 7, 14 and 28). (A) ALI day 0 western blot images. (B) ALI day 7 western blot images. (C) ALI day 14 western blot images. (D) ALI day 28 western blot images.
